# Supplementary material
Source: publisher site journal article supplement (https://www.dovepress.com/article/540342)
Supplement: Supplementary file 1 [file 540342%20Revised%20Supplementary%20Tables%201-3.docx]

**Supplementary Table 1** Comparison of general characters between FPS and LPS groups

|  | FPS group(n=121) | LPS group  (n=78) | t/Z/X2 vale | *P* vale |
| --- | --- | --- | --- | --- |
| Number of ovulation stimulation cycles (cycles) | 121 | 78 |  |  |
| Age (years) | 31.93±3.66 | 31.30±3.37 | -0.676 | 0.500 |
| BMI(kg/m2) | 22.90 (20.70, 27.12) | 23.44(20.31, 26.04) | -0.541 | 0.589 |
| Infertility factors (%) |  |  | 0.294 | 0.588 |
| Primary infertility | 76(62.8) | 45(59.0) |  |  |
| Secondary infertility | 45(37.2) | 32(41.0) |  |
| Infertility duration (years) | 4(2, 5) | 4(2, 6) | -0.191 | 0.849 |
| Mode of fertilization(%) |  |  | 0.607 | 0.436 |
| IVF | 81(66.9) | 48(61.5) |  |  |
| ICSI | 40(33.1) | 30(38.5) |  |  |
| Baseline hormone levels |  |  |  |  |
| FSH(mIU/ml) | 5.89(5.02,6.29) | 5.72(5.18,7.14) | -0.985 | 0.325 |
| LH(mIU/ml) | 5.10(3.19,8.00) | 4.89(3.08,6.99) | -0.874 | 0.382 |
| E2(pg/ml) | 47.71(36.38,56.46) | 43.45(34.23,52.33) | -1.290 | 0.197 |
| P(ng/ml) | 0.25(0.16,0.38) | 0.28(0.20,0.48) | -1.393 | 0.163 |

**Notes:** BMI, body mass index; IVF, in-vitro fertilization; ICSI, intracytoplasmic sperm injection; FSH, follicle-stimulating hormone; LH, luteinizing hormone; E2, estradiol; P, progesterone; FPS, follicular phase ovarian stimulation; LPS, luteal-phase ovarian stimulation.

**Supplementary Table 2** Laboratory Indices Comparison in IVF and ICSI Between FPS and LPS Groups

|  | IVF | | | | ICSI | | | |
| --- | --- | --- | --- | --- | --- | --- | --- | --- |
|  | FPS group (n=124） | LPS group (n=61） | *t/Z/X2* value | *P1* value | FPS group (n=68） | LPS group (n=46） | t/Z/X2 value | *P2* value |
| Number of oocytes retrieved | 12(8,16) | 10(6.25,14.75) | -1.692 | 0.091 | 11(7,15) | 8(5,13.25) | -1.715 | 0.086 |
| Number of MII oocytes | 10(6,13) | 9(6,12) | -0.802 | 0.423 | 9(6,11) | 7(5,10.5) | -1.512 | 0.130 |
| Number of 2PN | 5(3,8) | 5.5(4,8) | -0.399 | 0.690 | 6(4,9) | 5(3.5,7.5) | -0.824 | 0.410 |
| Number of available embryos | 4(2,6) | 4(3,5) | -0.143 | 0.886 | 4(3,6) | 4(2,7) | -1.050 | 0.294 |
| Number of good quality embryos | 4(2,6) | 3(4.5.7) | -1.841 | 0.066 | 4(3,7) | 5(4,7) | -0.925 | 0.355 |
| Number of blastocysts raised | 4(2,7) | 4.5(2,7) | -0.257 | 0.797 | 4(2.25,7) | 4(1.5,7.5) | -0.973 | 0.331 |
| Number of blastocyst formation | 3(1,5) | 2(1,4) | -0.815 | 0.415 | 3(2,4.75) | 2(0,5.5) | -1.331 | 0.183 |
| Number of good quality blastocyst formation | 1(0,3.5) | 1(0,2.75) | -0.926 | 0.354 | 2(1,4) | 1(0,2.5) | -2.008 | 0.045 |
| Oocyte retrieval rate (%) | 1035/1256(82.4) | 581/706(82.3) | 0.004 | 0.951 | 465/556(83.6) | 285/352(81.0) | 1.067 | 0.302 |
| MII oocyte rate(%) | 849/1035(82.0) | 502/581(86.4) | 5.192 | 0.023 | 379/465(81.5) | 243/285(85.3) | 1.763 | 0.184 |
| Rate of good quality embryos (%) | 344/477(72.1) | 276/334(82.6) | 12.069 | <0.001 | 204/275(74.2) | 168/190(88.4) | 14.239 | <0.001 |
| Rate of blastocyst formation (%) | 263/394(66.8) | 166/281(59.1) | 4.173 | 0.041 | 147/215(68.4) | 94/141(66.7) | 0.113 | 0.736 |
| Ratio of good quality blastocysts (%) | 173/263(65.8) | 95/166(57.2) | 3.174 | 0.075 | 103/147(70.1) | 52/94(55.3) | 5.434 | 0.020 |

**Notes:** *P1* is the comparison of IVF cycles between the FPS group and the LPS group; *P2* is the comparison of ICSI cycles between FPS group and LPS group.

IVF, in-vitro fertilization; ICSI, intracytoplasmic sperm injection; FPS, follicular phase ovarian stimulation; LPS, luteal-phase ovarian stimulation; MII, metaphase II; 2PN, 2pronucleus;

**Supplementary Table 3** Baseline characters for Early, Mid-, Late LPS and FPS Groups

|  | Early LPS  (n=40) | Mid-LPS  (n=38) | Late LPS  (n=29) | FPS(n=121) | F/Z/X2 value | *P* value |
| --- | --- | --- | --- | --- | --- | --- |
| Age (years) | 31.73±4.13 | 29.50±3.39 | 31.90±2.18 | 31.93±3.66 | 0.545 | 0.909 |
| BMI(kg/m2) | 21.53(19.20,26.04) | 22.93(19.06,25.76) | 22.95(20.77,27.53) | 22.90(20.70, 27.12) | 2.417 | 0.490 |
| Infertility factors (%) |  |  |  |  | 0.544 | 0.909 |
| Primary infertility | 18(62.1) | 15(55.6) | 13(59.1) | 76(62.8) |  |  |
| Secondary infertility | 11(37.9) | 12(44.4) | 9(40.9) | 45(37.2) |  |  |
| Infertility duration (years) | 4(3,6) | 2(2,5) | 4(1,6) | 4(2, 5) | 5.580 | 0.134 |
| Mode of fertilization(%) |  |  |  |  | 0.782 | 0.854 |
| IVF | 17(58.6) | 17(63.0) | 14(63.6) | 81(66.9) |  |  |
| ICSI | 12(41.4) | 10(37.0) | 8 (36.4) | 40(33.1) |  |  |
| Baseline hormone levels |  |  |  |  |  |  |
| FSH(mIU/ml) | 5.77(5.11,6.52) | 6.13(5.23,8.17) | 5.58(5.11,7.21) | 5.89(5.02,6.29) | 2.039 | 0.564 |
| LH(mIU/ml) | 5.04(2.85,7.28) | 3.77(2.90,5.02) | 6.25(3.57,7.78) | 5.10(3.19,8.00) | 3.908 | 0.272 |
| E2(pg/ml) | 42.60(32.50,58.00) | 38.94(25.70,50.10) | 47.60(40.93,54.15) | 47.71(36.38,56.46) | 5.351 | 0.148 |
| P(ng/ml) | 0.30(0.20,0.52) | 0.25(0.22,0.66) | 0.31(0.19,0.46) | 0.25(0.16,0.38) | 1.987 | 0.575 |
| AFC | 16(10,24) | 19.5(9,24) | 20(17.5,24) | 21(13,24) | 7.922 | 0.048**c** |

**Notes:** c. Statistically significant difference between early and FPS group. FPS, follicular phase ovarian stimulation; LPS, luteal-phase ovarian stimulation; IVF, in-vitro fertilization; ICSI, intracytoplasmic sperm injection; FSH, follicle-stimulating hormone; LH, luteinizing hormone; E2, estradiol; P, progesterone; AFC, antral follicle count
